# Supplementary material for: Modifiable lifestyle behaviors, but not a genetic risk score, associate with metabolic syndrome in evening chronotypes
Source: PubMed Central journal article supplement (PMC5772646; doi:10.1038/s41598-017-18268-z), 2018-01-17
Supplement: 41598_2017_18268_MOESM1_ESM.pdf [file 41598_2017_18268_MOESM1_ESM.pdf]

**Title:** Modifiable lifestyle behaviors, but not a genetic risk score, associate with metabolic syndrome in evening chronotypes.

**Authors:** Beatriz Vera<sup>1\*\*</sup>, Hassan S Dashti<sup>2\*\*</sup>, Purificación Gómez-Abellán<sup>1</sup>, Antonio M. Hernández-Martínez<sup>3</sup>, Alberto Esteban<sup>4</sup>, Frank AJL Scheer<sup>5,6</sup>, Richa Saxena<sup>2^\*</sup>, Marta Garaulet<sup>1^\*</sup>.

## Appendix 1.

| <b>Term</b>                           | <b>Definition</b>                                                                                                                                                                                                                                                                 |
|---------------------------------------|-----------------------------------------------------------------------------------------------------------------------------------------------------------------------------------------------------------------------------------------------------------------------------------|
| <i>Acrophase</i>                      | Timing of the maximum value of the cosine function                                                                                                                                                                                                                                |
| <i>Circadian Function Index (CFI)</i> | A numerical index that determines the circadian robustness, based on three circadian parameters: Interdaily stability (IS), Intraday variability (IV) and Relative Amplitude (RA). CFI oscillates between 0 (absence of circadian rhythmicity) and 1 (a robust circadian rhythm). |
| <i>Interdaily Stability (IS)</i>      | The similarity of the 24 h pattern over days; varied between 0 for Gaussian noise and 1 for perfect stability, where the pattern repeated itself exactly day after day.                                                                                                           |
| <i>Intraday Variability</i>           | Characterizes the rhythm fragmentation                                                                                                                                                                                                                                            |
| <i>M5</i>                             | The average of the 5 consecutive hours of minimum activity values                                                                                                                                                                                                                 |
| <i>M10</i>                            | Average 10 consecutive hours of maximum activity value                                                                                                                                                                                                                            |
| <i>Percentage of rhythmicity (PR)</i> | Percentage of variance of data explained by the sinusoidal function. Higher values of this parameter mean a more sinusoidal curve.                                                                                                                                                |
| <i>TM5</i>                            | Timing of M5                                                                                                                                                                                                                                                                      |
| <i>TM10</i>                           | Timing of M10                                                                                                                                                                                                                                                                     |

**Supplemental table 1.** General characteristics of population with Genetic Risk Score

| n=1,693                                                 | Mean         | SD    |
|---------------------------------------------------------|--------------|-------|
| Age (y)                                                 | 40.53        | 12.42 |
| % Women, n (%)                                          | 1363 (80.65) | -     |
| BMI (kg/m <sup>2</sup> )                                | 31.26        | 5.41  |
| Body fat (%)                                            | 37.17        | 6.71  |
| <b><i>Metabolic syndrome and insulin resistance</i></b> |              |       |
| Waist (cm)                                              | 102.83       | 14.89 |
| Fasting glucose (mg/dl)                                 | 85.15        | 15.03 |
| Triglycerides (mg/dl)                                   | 102.00       | 51.90 |
| HDL-c (mg/dl)                                           | 56.43        | 14.89 |
| Systolic Pressure (mmHg)                                | 11.67        | 1.49  |
| Diastolic pressure (mmHg)                               | 7.22         | 1.00  |
| MetS Score                                              | 2.12         | 1.17  |
| Insulin ( $\mu$ UI/ml)                                  | 7.27         | 6.52  |
| HOMA-IR                                                 | 1.59         | 1.60  |

Abbreviations: BMI; Body mass index. MetS; Metabolic Syndrome. HDL-c; High Density Lipoprotein. VLDL-c; Very Low Density Lipoprotein-Cholesterol. HOMA-IR; Homeostatic Model Assessment-Insulin Resistance

**Supplemental table 2.** Cross-validation of discriminant function of chronotype.

| <b>Classification percent as</b> |                |                |                |
|----------------------------------|----------------|----------------|----------------|
| <b>Actual group</b>              | <b>Evening</b> | <b>Morning</b> | <b>Total N</b> |
| Evening                          | 56 (n= 441)    | 44 (n= 350)    | 791            |
| Morning                          | 42 (n= 370)    | 58 (n= 511)    | 881            |

Overall classification accuracy=**57%**
